# Supplementary material for: Hyperkalemia and its Association With Mortality, Cardiovascular Events, Hospitalizations, and Intensive Care Unit Admissions in a Population-Based Retrospective Cohort
Source: PubMed Central journal article supplement — Kidney Int Rep. 2021 Mar 17;6(5):1309–16. doi: 10.1016/j.ekir.2021.02.038 (PMC8116905; doi:10.1016/j.ekir.2021.02.038), 2021-03-17
Supplement: mmc1.pdf [file mmc1.pdf]

## Appendix

**Supplementary Table 1: STROBE Statement for *cohort studies***

|                              | <b>Item No</b> | <b>Recommendation</b>                                                                                                                                                                | <b>Page No</b> |
|------------------------------|----------------|--------------------------------------------------------------------------------------------------------------------------------------------------------------------------------------|----------------|
| <b>Title and abstract</b>    | 1              | (a) Indicate the study's design with a commonly used term in the title or the abstract                                                                                               | 1              |
|                              |                | (b) Provide in the abstract an informative and balanced summary of what was done and what was found                                                                                  | 3-4            |
| <b>Introduction</b>          |                |                                                                                                                                                                                      |                |
| Background/rationale         | 2              | Explain the scientific background and rationale for the investigation being reported                                                                                                 | 5-6            |
| Objectives                   | 3              | State specific objectives, including any prespecified hypotheses                                                                                                                     | 6              |
| <b>Methods</b>               |                |                                                                                                                                                                                      |                |
| Study design                 | 4              | Present key elements of study design early in the paper                                                                                                                              | 5-7            |
| Setting                      | 5              | Describe the setting, locations, and relevant dates, including periods of recruitment, exposure, follow-up, and data collection                                                      | 6-7            |
| Participants                 | 6              | (a) Give the eligibility criteria, and the sources and methods of selection of participants. Describe methods of follow-up                                                           | 7              |
|                              |                | (b) For matched studies, give matching criteria and number of exposed and unexposed                                                                                                  | 8              |
| Variables                    | 7              | Clearly define all outcomes, exposures, predictors, potential confounders, and effect modifiers. Give diagnostic criteria, if applicable                                             | 7-8            |
| Data sources/<br>measurement | 8*             | For each variable of interest, give sources of data and details of methods of assessment (measurement). Describe comparability of assessment methods if there is more than one group | 8              |
| Bias                         | 9              | Describe any efforts to address potential sources of bias                                                                                                                            | 8-9            |
| Study size                   | 10             | Explain how the study size was arrived at                                                                                                                                            | 9              |
| Quantitative variables       | 11             | Explain how quantitative variables were handled in the analyses. If applicable, describe which groupings were chosen and why                                                         | 8              |
| Statistical methods          | 12             | (a) Describe all statistical methods, including those used to control for confounding                                                                                                | 8-9            |
|                              |                | (b) Describe any methods used to examine subgroups and interactions                                                                                                                  |                |

|                  |     |                                                                                                                                                                                                                                                                                                         |                   |
|------------------|-----|---------------------------------------------------------------------------------------------------------------------------------------------------------------------------------------------------------------------------------------------------------------------------------------------------------|-------------------|
|                  |     | (c) Explain how missing data were addressed                                                                                                                                                                                                                                                             |                   |
|                  |     | (d) If applicable, explain how loss to follow-up was addressed                                                                                                                                                                                                                                          |                   |
|                  |     | (e) Describe any sensitivity analyses                                                                                                                                                                                                                                                                   |                   |
| <b>Results</b>   |     |                                                                                                                                                                                                                                                                                                         |                   |
| Participants     | 13* | (a) Report numbers of individuals at each stage of study—eg numbers potentially eligible, examined for eligibility, confirmed eligible, included in the study, completing follow-up, and analysed<br><br>(b) Give reasons for non-participation at each stage<br><br>(c) Consider use of a flow diagram | 9<br><br>Figure 1 |
| Descriptive data | 14* | (a) Give characteristics of study participants (eg demographic, clinical, social) and information on exposures and potential confounders<br><br>(b) Indicate number of participants with missing data for each variable of interest<br><br>(c) Summarise follow-up time (eg, average and total amount)  | 9                 |
| Outcome data     | 15* | Report numbers of outcome events or summary measures over time                                                                                                                                                                                                                                          | 10                |

|                          |    |                                                                                                                                                                                                                                                                                                                                                                                                                       |       |
|--------------------------|----|-----------------------------------------------------------------------------------------------------------------------------------------------------------------------------------------------------------------------------------------------------------------------------------------------------------------------------------------------------------------------------------------------------------------------|-------|
| Main results             | 16 | (a) Give unadjusted estimates and, if applicable, confounder-adjusted estimates and their precision (eg, 95% confidence interval). Make clear which confounders were adjusted for and why they were included<br><br>(b) Report category boundaries when continuous variables were categorized<br><br>(c) If relevant, consider translating estimates of relative risk into absolute risk for a meaningful time period | 10    |
| Other analyses           | 17 | Report other analyses done—eg analyses of subgroups and interactions, and sensitivity analyses                                                                                                                                                                                                                                                                                                                        | 10-11 |
| <b>Discussion</b>        |    |                                                                                                                                                                                                                                                                                                                                                                                                                       |       |
| Key results              | 18 | Summarise key results with reference to study objectives                                                                                                                                                                                                                                                                                                                                                              | 11-14 |
| Limitations              | 19 | Discuss limitations of the study, taking into account sources of potential bias or imprecision. Discuss both direction and magnitude of any potential bias                                                                                                                                                                                                                                                            | 14    |
| Interpretation           | 20 | Give a cautious overall interpretation of results considering objectives, limitations, multiplicity of analyses, results from similar studies, and other relevant evidence                                                                                                                                                                                                                                            | 14    |
| Generalisability         | 21 | Discuss the generalisability (external validity) of the study results                                                                                                                                                                                                                                                                                                                                                 | 14-15 |
| <b>Other information</b> |    |                                                                                                                                                                                                                                                                                                                                                                                                                       |       |
| Funding                  | 22 | Give the source of funding and the role of the funders for the present study and, if applicable, for the original study on which the present article is based                                                                                                                                                                                                                                                         | 16    |

**Supplementary Table 2. Code definitions for baseline comorbidities**

| Category                                                   | ICD-9                                                                  | ICD-10                                                                      | ATC codes                                                                                                                                                                                                                                                                                                                                                                                                                                                                                                                                                                              | Laboratory Data                                                                                                                |
|------------------------------------------------------------|------------------------------------------------------------------------|-----------------------------------------------------------------------------|----------------------------------------------------------------------------------------------------------------------------------------------------------------------------------------------------------------------------------------------------------------------------------------------------------------------------------------------------------------------------------------------------------------------------------------------------------------------------------------------------------------------------------------------------------------------------------------|--------------------------------------------------------------------------------------------------------------------------------|
| Chronic Kidney Disease (excluding End Stage Renal Disease) | 250.4, 403, 404, 580, 581, 582, 583, 585, 586, 587, 588, 591, 593, 753 | E10.2, E11.2, I12, I13, N18, N19, N00-N16, N25, N26, N28.82, N39.1, Q60-Q64 | A11CC04, A11CC03, H05BX03, H05BX02, V03AE02, V03AE03, V03AE04, B03XA01, B03XA02, B03XA04, V03AE03, V03AE01, A02AC01, A12AA04, H05BX01                                                                                                                                                                                                                                                                                                                                                                                                                                                  | Two abnormal eGFR tests at least 90 days apart.<br><br>Abnormal eGFR was defined as an eGFR below 60 mL/min/1.73m <sup>2</sup> |
| Diabetes Mellitus                                          | 250.x                                                                  | E10-E14                                                                     | A10                                                                                                                                                                                                                                                                                                                                                                                                                                                                                                                                                                                    | n/a                                                                                                                            |
| Heart Failure                                              | 428.0, 428.1-5, 428.9                                                  | I50, I50.9, I50.1, I50.20-23, I50.30-33, I5040-43                           | n/a                                                                                                                                                                                                                                                                                                                                                                                                                                                                                                                                                                                    | n/a                                                                                                                            |
| Hypertension                                               | 401.xx, 402.00, 402.1, 402.10, 402.90, 403.xx-405.xx                   | I10-I13, I15                                                                | C02AB01, C02AB02, C02AC01, C02CA04, C02CA05, C02DB02, C02DC01, C02KX01, C02LA01, C02LB01, G04CA03, C03AA03, C03BA04, C03BA11, C03CA01, C03CA02, C03CC01, C03DA01, C03DB01, C03DB02, C03EA01, C07AA02, C07AA03, C07AA05, C07AA06, C07AA12, C07AB02, C07AB03, C07AB04, C07AB07, C07AG01, C07BA05, C07BA06, C07CA03, C07CB03, C08CA01, C08CA02, C08CA04, C08CA05, C08CA06, C08DA01, C08DB01, C09AA01, C09AA02, C09AA03, C09AA04, C09AA05, C09AA06, C09AA07, C09AA08, C09AA09, C09AA10, C09BA02, C09BA03, C09BA04, C09BA06, C09BA08, C09CA01, C09CA02, C09CA03, C09CA04, C09CA06, C09CA07, | N/a                                                                                                                            |

|  |  |  |                                                         |  |
|--|--|--|---------------------------------------------------------|--|
|  |  |  | C09DA01, C09DA02, C09DA03,<br>C09DA04, C09DA06, C09DA07 |  |
|--|--|--|---------------------------------------------------------|--|

**Supplementary Table 3: Baseline Characteristics stratified by Serum Potassium levels**

| <u>Characteristic</u>    | <u>Overall</u><br><u>n=93,667</u> | <u>≥5.0 K+ &lt;5.5</u><br><u>(n =75,364)</u> | <u>≥5.5 K+ &lt;6.0</u><br><u>(n =12,139)</u> | <u>≥6.0 K+ &lt;6.5</u><br><u>(n =3,349)</u> | <u>≥6.5 K+ &lt;7.0</u><br><u>(n=1,378)</u> | <u>K+ ≥ 7.0</u><br><u>(n= 1,437)</u> |
|--------------------------|-----------------------------------|----------------------------------------------|----------------------------------------------|---------------------------------------------|--------------------------------------------|--------------------------------------|
| <b>Demographics</b>      |                                   |                                              |                                              |                                             |                                            |                                      |
| <u>Age (years)</u>       | <u>64.15±18.09</u>                | <u>64.45±17.81</u>                           | <u>65.06±18.30</u>                           | <u>63.25±19.33</u>                          | <u>61.95±19.20</u>                         | <u>60.24±19.77</u>                   |
| <u>Sex (% female)</u>    | <u>43,541</u><br><u>(45.64%)</u>  | <u>34,432</u><br><u>(45.69%)</u>             | <u>5,537</u><br><u>(45.61%)</u>              | <u>1,579</u><br><u>(47.15%)</u>             | <u>637</u><br><u>(46.23%)</u>              | <u>693</u><br><u>(48.23%)</u>        |
| <b>Comorbidities</b>     |                                   |                                              |                                              |                                             |                                            |                                      |
| <u>CKD</u>               | <u>26,566</u><br><u>(28.4%)</u>   | <u>20,683</u><br><u>(27.44%)</u>             | <u>3,917</u><br><u>(32.27%)</u>              | <u>1,095</u><br><u>(32.70%)</u>             | <u>437</u><br><u>(31.71%)</u>              | <u>434</u><br><u>(30.20%)</u>        |
| <u>Hypertension</u>      | <u>65,161</u><br><u>(69.6%)</u>   | <u>52,316</u><br><u>(69.42%)</u>             | <u>8,683</u><br><u>(71.53%)</u>              | <u>2,320</u><br><u>(68.74%)</u>             | <u>943</u><br><u>(68.43%)</u>              | <u>917</u><br><u>(63.81%)</u>        |
| <u>Diabetes Mellitus</u> | <u>33,548</u><br><u>(35.8%)</u>   | <u>26,520</u><br><u>(35.19%)</u>             | <u>4,683</u><br><u>(38.58%)</u>              | <u>1,283</u><br><u>(38.31%)</u>             | <u>522</u><br><u>(37.88%)</u>              | <u>540</u><br><u>(37.58%)</u>        |
| <u>Heart Failure</u>     | <u>19,374</u><br><u>(20.7%)</u>   | <u>14,861</u><br><u>(19.72%)</u>             | <u>2,974</u><br><u>(24.50%)</u>              | <u>870</u><br><u>(25.98%)</u>               | <u>345</u><br><u>(25.04%)</u>              | <u>324</u><br><u>(22.55%)</u>        |
| <b>Medications</b>       |                                   |                                              |                                              |                                             |                                            |                                      |
| <u>RAAS inhibitors</u>   | <u>33,381</u><br><u>(35.6%)</u>   | <u>26,599</u><br><u>(35.29%)</u>             | <u>4,620</u><br><u>(38.06%)</u>              | <u>1,234</u><br><u>(36.85%)</u>             | <u>485</u><br><u>(35.20%)</u>              | <u>443</u><br><u>(30.83%)</u>        |
| <u>Beta Blockers</u>     | <u>22,019</u><br><u>(23.5%)</u>   | <u>17,438</u><br><u>(23.14%)</u>             | <u>3,094</u><br><u>(25.49%)</u>              | <u>836</u><br><u>(24.96%)</u>               | <u>341</u><br><u>(24.75%)</u>              | <u>310</u><br><u>(21.57%)</u>        |
| <u>Azole Antifungals</u> | <u>211</u><br><u>(0.2%)</u>       | <u>168</u><br><u>(0.22%)</u>                 | <u>33</u><br><u>(0.27%)</u>                  | <u>7</u> (0.21%)                            | <u>*</u>                                   | <u>*</u>                             |
| <u>Cyclosporine</u>      | <u>114</u> (0.1%)                 | <u>97</u> (0.13%)                            | <u>11</u> (0.09%)                            | <u>*</u>                                    | <u>*</u>                                   | <u>*</u>                             |
| <u>Digoxin</u>           | <u>3,136</u><br><u>(3.4%)</u>     | <u>2,412</u><br><u>(3.20%)</u>               | <u>464</u><br><u>(3.82%)</u>                 | <u>140</u><br><u>(4.18%)</u>                | <u>69</u><br><u>(5.01%)</u>                | <u>51</u><br><u>(3.55%)</u>          |
| <u>Heparin</u>           | <u>545</u> (0.6%)                 | <u>417</u> (0.55%)                           | <u>84</u> (0.69%)                            | <u>21</u> (0.63%)                           | <u>13</u><br><u>(0.94%)</u>                | <u>10</u><br><u>(0.70%)</u>          |
| <u>NSAIDs</u>            | <u>5,090</u><br><u>(5.4%)</u>     | <u>4,036</u><br><u>(5.36%)</u>               | <u>689</u><br><u>(5.68%)</u>                 | <u>196</u><br><u>(5.85%)</u>                | <u>87</u><br><u>(6.31%)</u>                | <u>82</u><br><u>(5.71%)</u>          |
| <u>K Supplements</u>     | <u>2,872</u><br><u>(3.1%)</u>     | <u>2,090</u><br><u>(2.77%)</u>               | <u>503</u><br><u>(4.14%)</u>                 | <u>129</u> (3.85%)                          | <u>80</u><br><u>(5.81%)</u>                | <u>70</u><br><u>(4.87%)</u>          |
| <u>Tacrolimus</u>        | <u>108</u> (0.1%)                 | <u>99</u> (0.13%)                            | <u>9</u> (0.07%)                             | <u>0</u>                                    | <u>0</u>                                   | <u>0</u>                             |
| <u>Trimethoprim</u>      | <u>1,929</u><br><u>(2.1%)</u>     | <u>1,484</u><br><u>(1.97%)</u>               | <u>300</u><br><u>(2.47%)</u>                 | <u>89</u><br><u>(2.66%)</u>                 | <u>28</u><br><u>(2.03%)</u>                | <u>28</u><br><u>(1.95%)</u>          |

Abbreviations: CKD: Chronic Kidney Disease; DM: Diabetes mellitus; HF: Heart Failure; HTN: Hypertension; K+: Potassium; NSAIDs: Nonsteroidal anti-inflammatory drugs.

\*Not reported due to small numbers

Supplementary Table 34. Outcomes, time at risk and crude rates by high-risk subgroup

| <b>All-cause mortality</b>              |               |                                        |                                                |
|-----------------------------------------|---------------|----------------------------------------|------------------------------------------------|
| <b>Cohort</b>                           | <b>Events</b> | <b>Time at risk<br/>(person-years)</b> | <b>Crude rate<br/>(per 100 person-years)</b>   |
| <b>CKD</b>                              | 12,729        | 83,970                                 | 15.16                                          |
| <b>Diabetes Mellitus</b>                | 12,044        | 111,106                                | 10.84                                          |
| <b>Heart Failure</b>                    | 11,395        | 52,427                                 | 21.73                                          |
| <b>Hypertension</b>                     | 24,478        | 203,831                                | 12.01                                          |
| <b>Short Term mortality<sup>1</sup></b> |               |                                        |                                                |
| <b>Cohort</b>                           | <b>Events</b> | <b>Time at risk<br/>(person-years)</b> | <b>Crude rate<br/>(per person-year)</b>        |
| <b>CKD</b>                              | 2,230         | 2,057                                  | 1.08                                           |
| <b>Diabetes Mellitus</b>                | 2,285         | 2,625                                  | 0.87                                           |
| <b>Heart Failure</b>                    | 2,614         | 1,441                                  | 1.81                                           |
| <b>Hypertension</b>                     | 5,368         | 5,045                                  | 1.06                                           |
| <b>Long term Mortality<sup>2</sup></b>  |               |                                        |                                                |
| <b>Cohort</b>                           | <b>Events</b> | <b>Time at risk<br/>(person-years)</b> | <b>Crude rate<br/>(per 100 person-years)</b>   |
| <b>CKD</b>                              | 10,499        | 81,913                                 | 12.82                                          |
| <b>Diabetes Mellitus</b>                | 9,759         | 108,481                                | 9.00                                           |
| <b>Heart Failure</b>                    | 8,781         | 50,985                                 | 17.22                                          |
| <b>Hypertension</b>                     | 19,380        | 198,785                                | 9.75                                           |
| <b>Cardiovascular Events</b>            |               |                                        |                                                |
| <b>Cohort</b>                           | <b>Events</b> | <b>Time at risk<br/>(person-years)</b> | <b>Crude rate<br/>(per 100 person-years)</b>   |
| <b>CKD</b>                              | 11,112        | 83,586                                 | 13.29                                          |
| <b>Diabetes Mellitus</b>                | 13,063        | 110,731                                | 11.80                                          |
| <b>Heart Failure</b>                    | 9,237         | 52,128                                 | 17.72                                          |
| <b>Hypertension</b>                     | 20,544        | 203,205                                | 10.11                                          |
| <b>Acute Dialysis</b>                   |               |                                        |                                                |
| <b>Cohort</b>                           | <b>Events</b> | <b>Time at risk<br/>(person-years)</b> | <b>Crude rate<br/>(per 1,000 person-years)</b> |
| <b>CKD</b>                              | 584           | 83,956                                 | 6.96                                           |
| <b>Diabetes Mellitus</b>                | 580           | 111,091                                | 5.22                                           |
| <b>Heart Failure</b>                    | 335           | 52,417                                 | 6.39                                           |
| <b>Hypertension</b>                     | 718           | 203,814                                | 3.52                                           |

| ICU Admission              |        |                                |                                      |
|----------------------------|--------|--------------------------------|--------------------------------------|
| Cohort                     | Events | Time at risk<br>(person-years) | Crude rate<br>(per 100 person-years) |
| CKD                        | 560    | 8,674                          | 6.46                                 |
| Diabetes Mellitus          | 570    | 4,911                          | 11.61                                |
| Heart Failure              | 369    | 3,389                          | 10.89                                |
| Hypertension               | 2317   | 70,152                         | 3.30                                 |
| All-cause Hospitalizations |        |                                |                                      |
| Cohort                     | Events | Time at risk<br>(person-years) | Crude rate<br>(per person-year)      |
| CKD                        | 7,777  | 8,480                          | 0.92                                 |
| Diabetes Mellitus          | 7,862  | 13,606                         | 0.58                                 |
| Heart Failure              | 2,814  | 3,301                          | 0.85                                 |
| Hypertension               | 39,763 | 69,242                         | 0.57                                 |

Supplementary Table 45. Baseline characteristics: propensity-score match of patients with and without Hyperkalemia\*.

| Characteristic                | With<br>Hyperkalemia†<br>(n = 18,247) | Without<br>Hyperkalemia<br>(n = 18,247) | SMD    |
|-------------------------------|---------------------------------------|-----------------------------------------|--------|
| <b>Demographics</b>           |                                       |                                         |        |
| Age (years)                   | 64.1 ± 18.7                           | 65.1 ± 18.8                             | 0.058  |
| Sex (% female)                | 8,429 (46.2%)                         | 8,401 (46.0%)                           | 0.003  |
| <b>Baseline Comorbidities</b> |                                       |                                         |        |
| Chronic Kidney Disease        | 5,827 (31.9%)                         | 5,792 (31.7%)                           | 0.041  |
| Diabetes Mellitus             | 6,984 (38.3%)                         | 7,097 (38.9%)                           | 0.012  |
| Heart Failure                 | 4,463 (24.46%)                        | 4,468 (24.49%)                          | 0.0006 |
| Hypertension                  | 12,835 (70.3%)                        | 13,180 (72.2%)                          | 0.042  |
| <b>Medications</b>            |                                       |                                         |        |
| RAAS inhibitors               |                                       |                                         |        |

|                                   |                |                |       |
|-----------------------------------|----------------|----------------|-------|
| <i>Current users</i> <sup>1</sup> | 6,738 (36.9%)  | 6,866 (37.6%)  | 0.012 |
| <i>Non-users</i> <sup>2</sup>     | 2,402 (13.2%)  | 2,564 (14.0%)  | 0.026 |
| <i>Never users</i> <sup>3</sup>   | 9,107 (49.9%)  | 8,817 (48.3%)  | 0.032 |
| Azole antifungals                 |                |                |       |
| <i>Current users</i>              | 43 (0.2%)      | 33 (0.2%)      | 0.012 |
| <i>Non-users</i>                  | 990 (5.4%)     | 990 (5.4%)     | 0     |
| <i>Never users</i>                | 17,214 (94.3%) | 17,224 (94.4%) | 0.002 |
| Beta-blockers                     |                |                |       |
| <i>Current users</i>              | 4,544 (24.9%)  | 4,771 (26.1%)  | 0.002 |
| <i>Non-users</i>                  | 1,558 (8.5%)   | 1,551 (8.5%)   | 0.028 |
| <i>Never users</i>                | 12,145 (66.5%) | 11,925 (65.3%) | 0.025 |
| Cyclosporine                      |                |                |       |
| <i>Current users</i>              | 17 (0.1%)      | 13 (0.1%)      | 0.008 |
| <i>Non-users</i>                  | 14 (0.1%)      | 16 (0.1%)      | 0.004 |
| <i>Never users</i>                | 18,216 (99.8%) | 18,218 (99.8%) | 0.003 |
| Digoxin                           |                |                |       |
| <i>Current users</i>              | 711 (3.9%)     | 668 (3.6%)     | 0.012 |
| <i>Non-users</i>                  | 315 (1.7%)     | 282 (1.5%)     | 0.014 |
| <i>Never users</i>                | 17,221 (94.4%) | 17,297 (94.8%) | 0.018 |
| Heparin                           |                |                |       |
| <i>Current users</i>              | 126 (0.7%)     | 109 (0.6%)     | 0.012 |
| <i>Non-users</i>                  | 625 (3.4%)     | 627 (3.4%)     | <.001 |
| <i>Never users</i>                | 17,496 (95.8%) | 17,511 (95.9%) | 0.004 |
| Prescription NSAIDs               |                |                |       |
| <i>Current users</i>              | 1,045 (5.7%)   | 1,010 (5.5%)   | 0.008 |
| <i>Non-users</i>                  | 5,607 (30.7%)  | 5,714 (31.3%)  | 0.013 |



|                       |                |                |       |
|-----------------------|----------------|----------------|-------|
| <i>Never users</i>    | 11,595 (63.5%) | 11,523 (63.1%) | 0.008 |
| Potassium Supplements |                |                |       |
| <i>Current users</i>  | 765 (4.2%)     | 717 (3.9%)     | 0.013 |
| <i>Non-users</i>      | 1,202 (6.6%)   | 1,134 (6.2%)   | 0.015 |
| <i>Never users</i>    | 16,280 (89.2%) | 16,396 (89.9%) | 0.020 |
| Tacrolimus            |                |                |       |
| <i>Current users</i>  | 9 (0.1%)       | 9 (0.1%)       | 0     |
| <i>Non-users</i>      | ‡              | ‡              | -     |
| <i>Never users</i>    | 18,236 (99.9%) | 18,236 (99.9%) | 0     |
| Trimethoprim          |                |                |       |
| <i>Current users</i>  | 431 (2.4%)     | 349 (1.9%)     | 0.031 |
| <i>Non-users</i>      | 3,333 (18.3%)  | 3,454 (18.9%)  | 0.017 |
| <i>Never users</i>    | 14,483 (79.4%) | 14,444 (79.2%) | 0.005 |

\*Subgroup of patients with Serum Potassium  $\geq 5.5$  mmol/L

†Defined as a Serum Potassium  $\geq 5.5$  mmol/L

‡Not reported due to small numbers

Abbreviations: NSAIDs: nonsteroidal anti-inflammatory drugs; RAAS: renin-angiotensin aldosterone system;

<sup>1</sup>A patient will be defined as a current user if 150% of the days' supply of the last prescription of a given exposure covers the date of incident hyperkalemia. <sup>2</sup>Non-users (or former users) were defined as patients with a prescription for a given exposure for which 150% of the days' supply of the last prescription days' supply did not overlap with the index date. <sup>3</sup>Patients with no record of any prescription for an exposure prior to index date were classified as never-users.

**Supplementary Table 56: Hazard ratios with 95% confidence interval and p-values of Cox proportional hazards regression models\***

| Model Type                      | All-cause mortality |        | Cardiovascular events |        |
|---------------------------------|---------------------|--------|-----------------------|--------|
|                                 | HR<br>(95% CI)      | p      | HR<br>(95% CI)        | p      |
| Propensity matched <sup>1</sup> | 1.66<br>(1.58-1.74) | <0.001 | 1.31<br>(1.17-1.45)   | <0.001 |

\*Subgroup of patients with Serum Potassium  $\geq 5.5$  mmol/L

Abbreviations: CI - confidence interval; HR - hazard ratio; p - p-value.

<sup>1</sup>Multivariate analysis in the propensity scored-matched sample was adjusted for the following covariates at baseline: age, sex, serum potassium value, comorbidities and medications.
